# Supplementary material
Source: publisher figshare collection journal article supplement (https://diabetesjournals.figshare.com/articles/dataset/_/21502599)
Supplement: Supplementary file 2 [file 1]

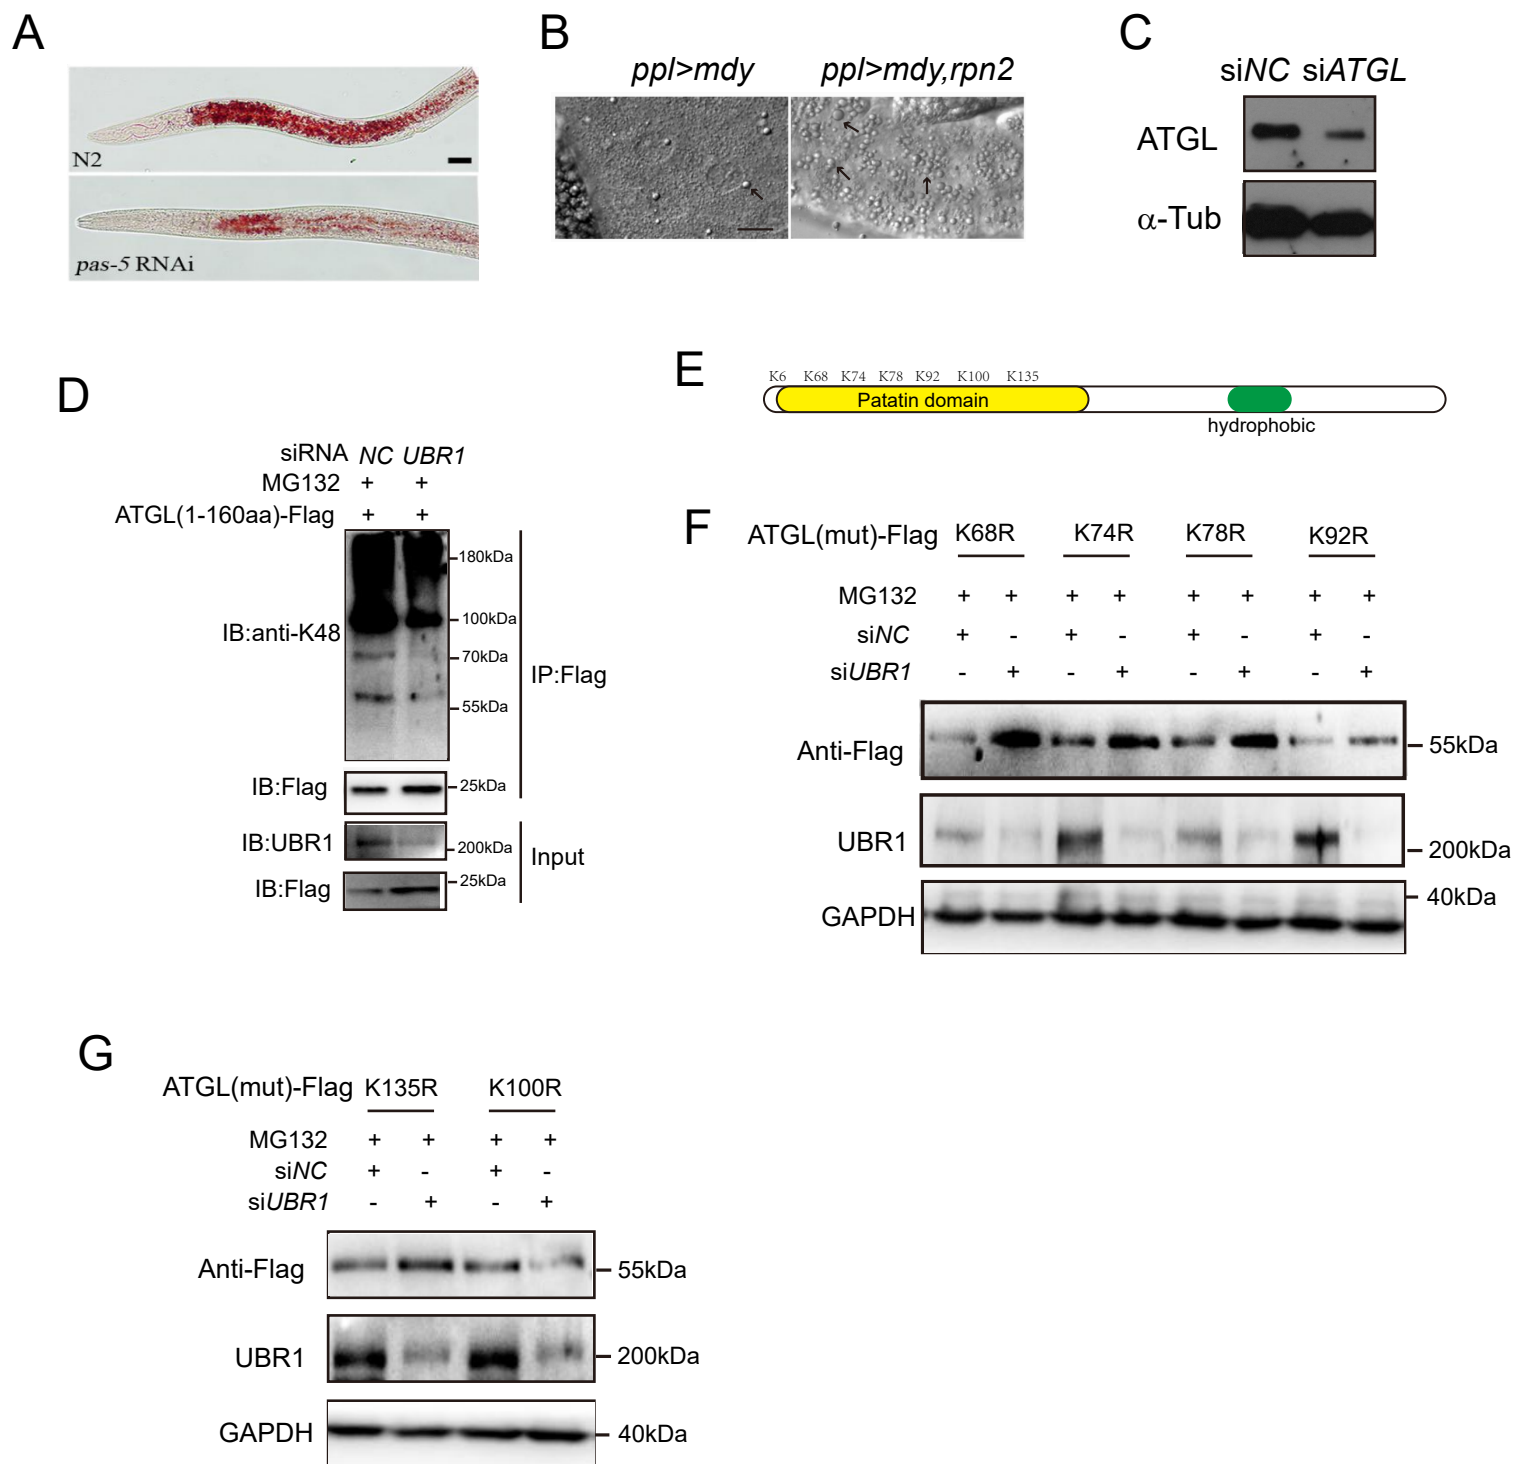

Supplemental Fig. 1 N-end rule regulation of ATGL

(A) Oil-Red-O staining for lipid droplets in *C. elegans* treated by *pas-5* RNAi compared to the N2 negative control (scale bar represents 40  $\mu$ m). (B) DIC images of lipid droplets in the 3<sup>rd</sup> instar salivary gland in fruit fly. *ppl>mdy*: overexpression of DGAT1 in salivary gland; *ppl>mdy, rpn2*: overexpression of DGAT1 and proteasome subunit Rpn2 in salivary gland (arrows indicate lipid droplets, scale bar represents 25  $\mu$ m). (C) Western blot analysis of proteins in HeLa cells transfected with indicated siRNAs. (D) Immunoprecipitation of ATGL(1-160aa)-Flag truncated protein and western blot analysis of ubiquitin in HeLa cells transfected with ATGL(1-160aa)-Flag and the indicated siRNAs. Cells were treated with MG132 for 12 hours. (E) The lysine residues in the N-terminal region of the ATGL protein. (F-G) Western blot analysis of proteins in HeLa cells transfected with ATGL(mut)-Flag vector and siRNAs. Cells were treated with MG132 for 12 hours.

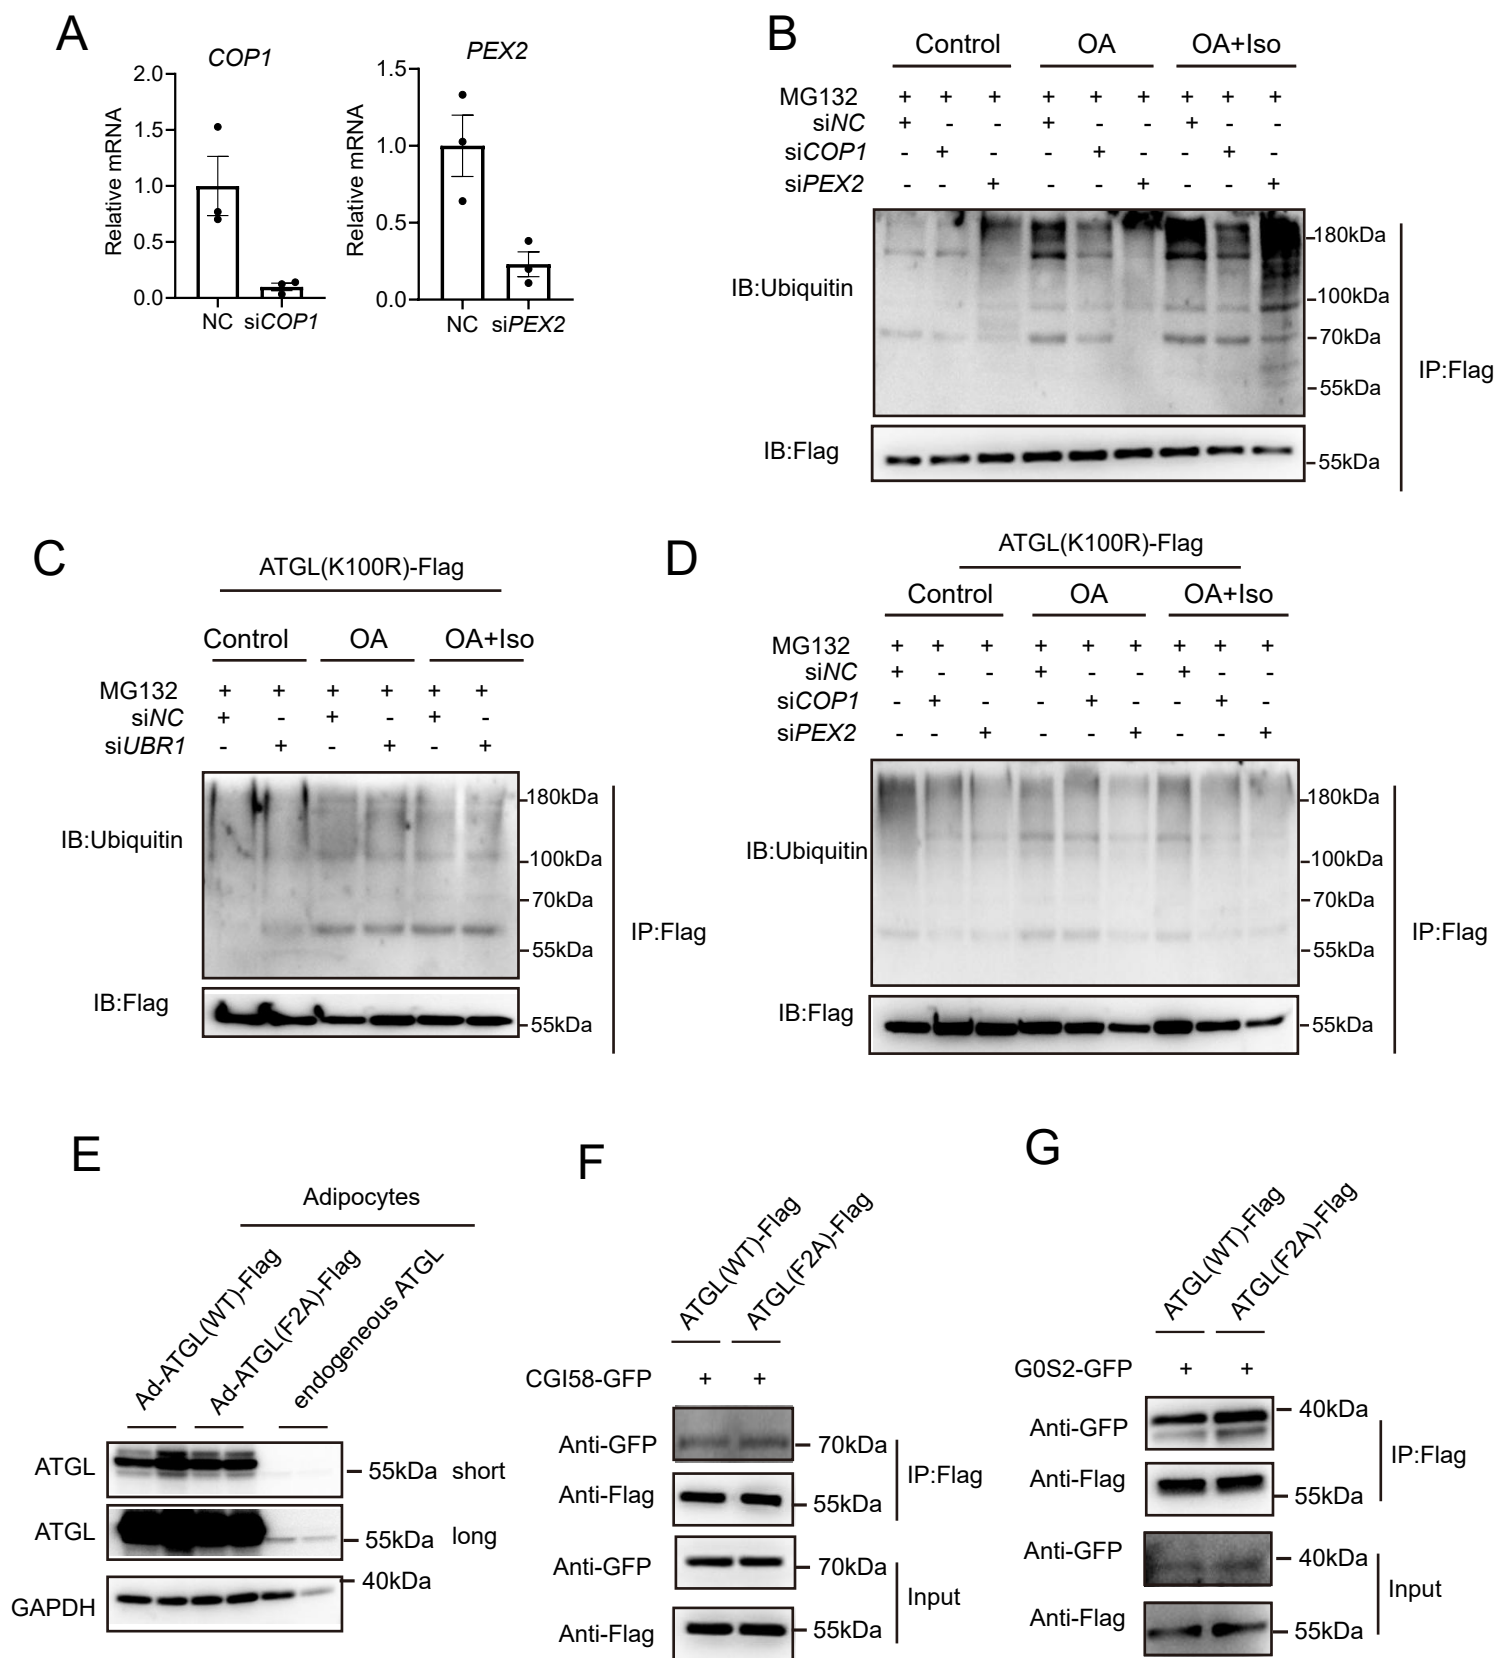

Supplemental Fig. 2 Regulation of the polyubiquitination levels of ATGL

(A) mRNA levels of *COP1* and *PEX2* in HeLa cells transfected with indicated siRNAs. (B) Immunoprecipitation of ATGL(WT)-Flag and western blot analysis of the polyubiquitination levels of ATGL in HeLa cells transfected with indicated siRNAs and treated with or without 100  $\mu$ M OA for 16 hours or with 100  $\mu$ M OA for 16 hours followed by ISO (0.25 mM IBMX/1  $\mu$ M isoproterenol) for 8 hours. (C-D) Immunoprecipitation of ATGL(K100R)-Flag and western blot analysis of the polyubiquitination levels of ATGL(K100R) in HeLa cells transfected with indicated siRNAs and treated with or without 100  $\mu$ M OA for 16 hours or with 100  $\mu$ M OA for 16 hours followed by ISO (0.25 mM IBMX/1  $\mu$ M isoproterenol) for 8 hours. (E) Western blot analysis of proteins in differentiated 3T3L1 adipocytes infected with equal amounts of Ad-ATGL(WT)-Flag or Ad-ATGL(F2A)-Flag. (F-G) Immunoprecipitation of ATGL(WT)-Flag or ATGL(F2A)-Flag and western blot analysis of associated proteins. All data are presented as mean $\pm$ SEM.

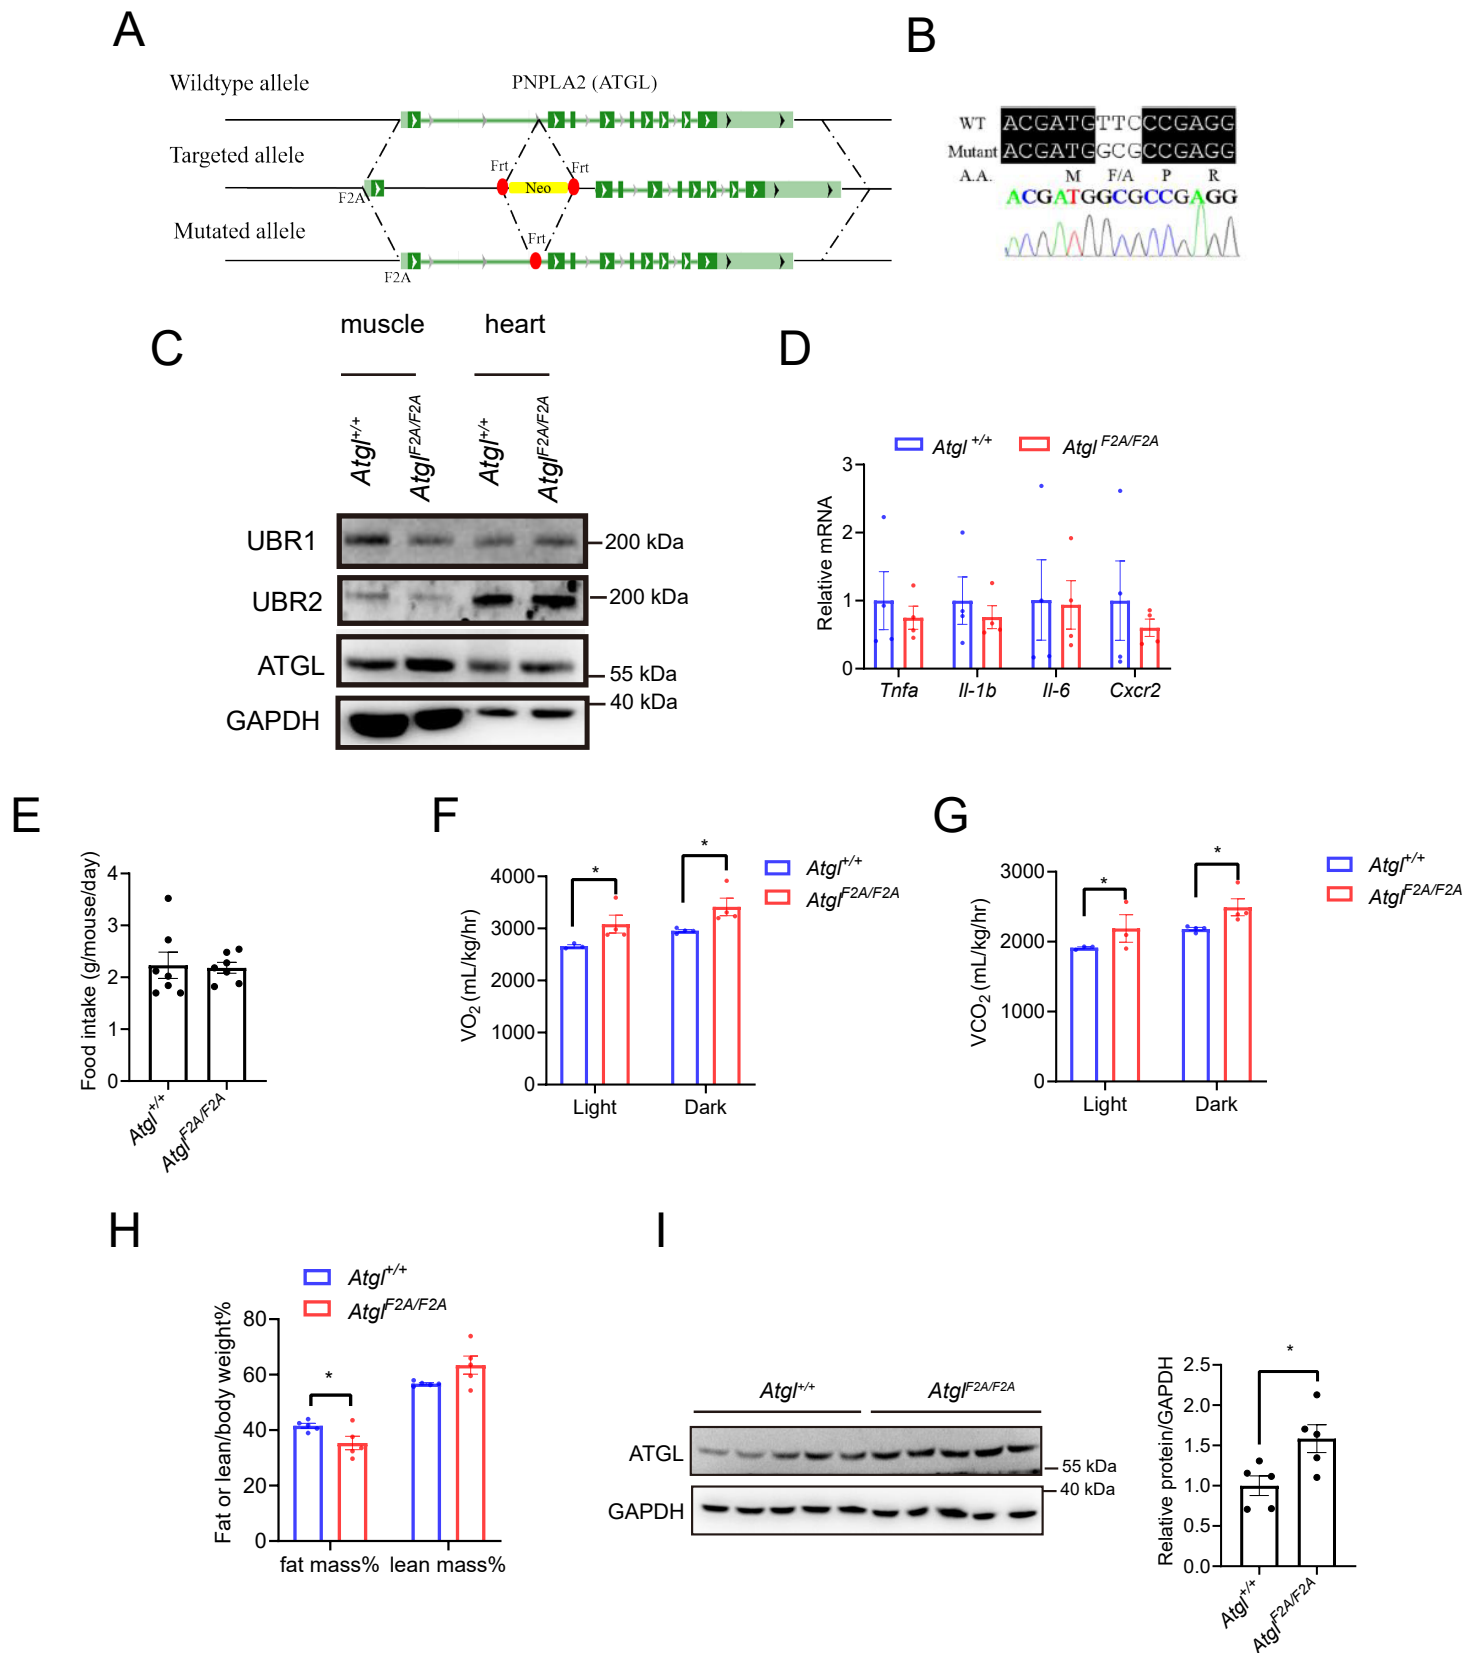

Supplemental Fig. 3 Characterization of *Atgl*<sup>F2A/F2A</sup> mice.

(A) Schematic illustration of the *Atgl*<sup>+/+</sup> and *Atgl*<sup>F2A/F2A</sup> alleles. (B) Comparison of the *Atgl*<sup>+/+</sup> and *Atgl*<sup>F2A/F2A</sup> sequences. In the mutant allele, the second codon is changed from F (TTC) to A (GCG). (C) Western blot analysis of proteins in the muscle and heart from *Atgl*<sup>+/+</sup> and *Atgl*<sup>F2A/F2A</sup> mice. (D) mRNA levels of inflammation genes in the adipose tissues from *Atgl*<sup>+/+</sup> and *Atgl*<sup>F2A/F2A</sup> mice which were fed an HFD for 8 weeks (N=4 mice per group). (E) Food intake in 8-week-old *Atgl*<sup>+/+</sup> and *Atgl*<sup>F2A/F2A</sup> mice which were pair-fed an HFD for 16 weeks (N=7 mice per group). (F-G) Oxygen consumption (VO<sub>2</sub>) (F) and carbon dioxide production (VCO<sub>2</sub>) (G) in HFD-fed *Atgl*<sup>+/+</sup> and *Atgl*<sup>F2A/F2A</sup> mice (N=3-4 mice per group). (H) Body composition of *Atgl*<sup>+/+</sup> and *Atgl*<sup>F2A/F2A</sup> mice which were fed an HFD for 8 weeks (N=5 mice per group). (I) Western blot analysis of ATGL in the liver of chow-fed mice (N=5 mice per group). All data are presented as mean±SEM. \* p < 0.05.

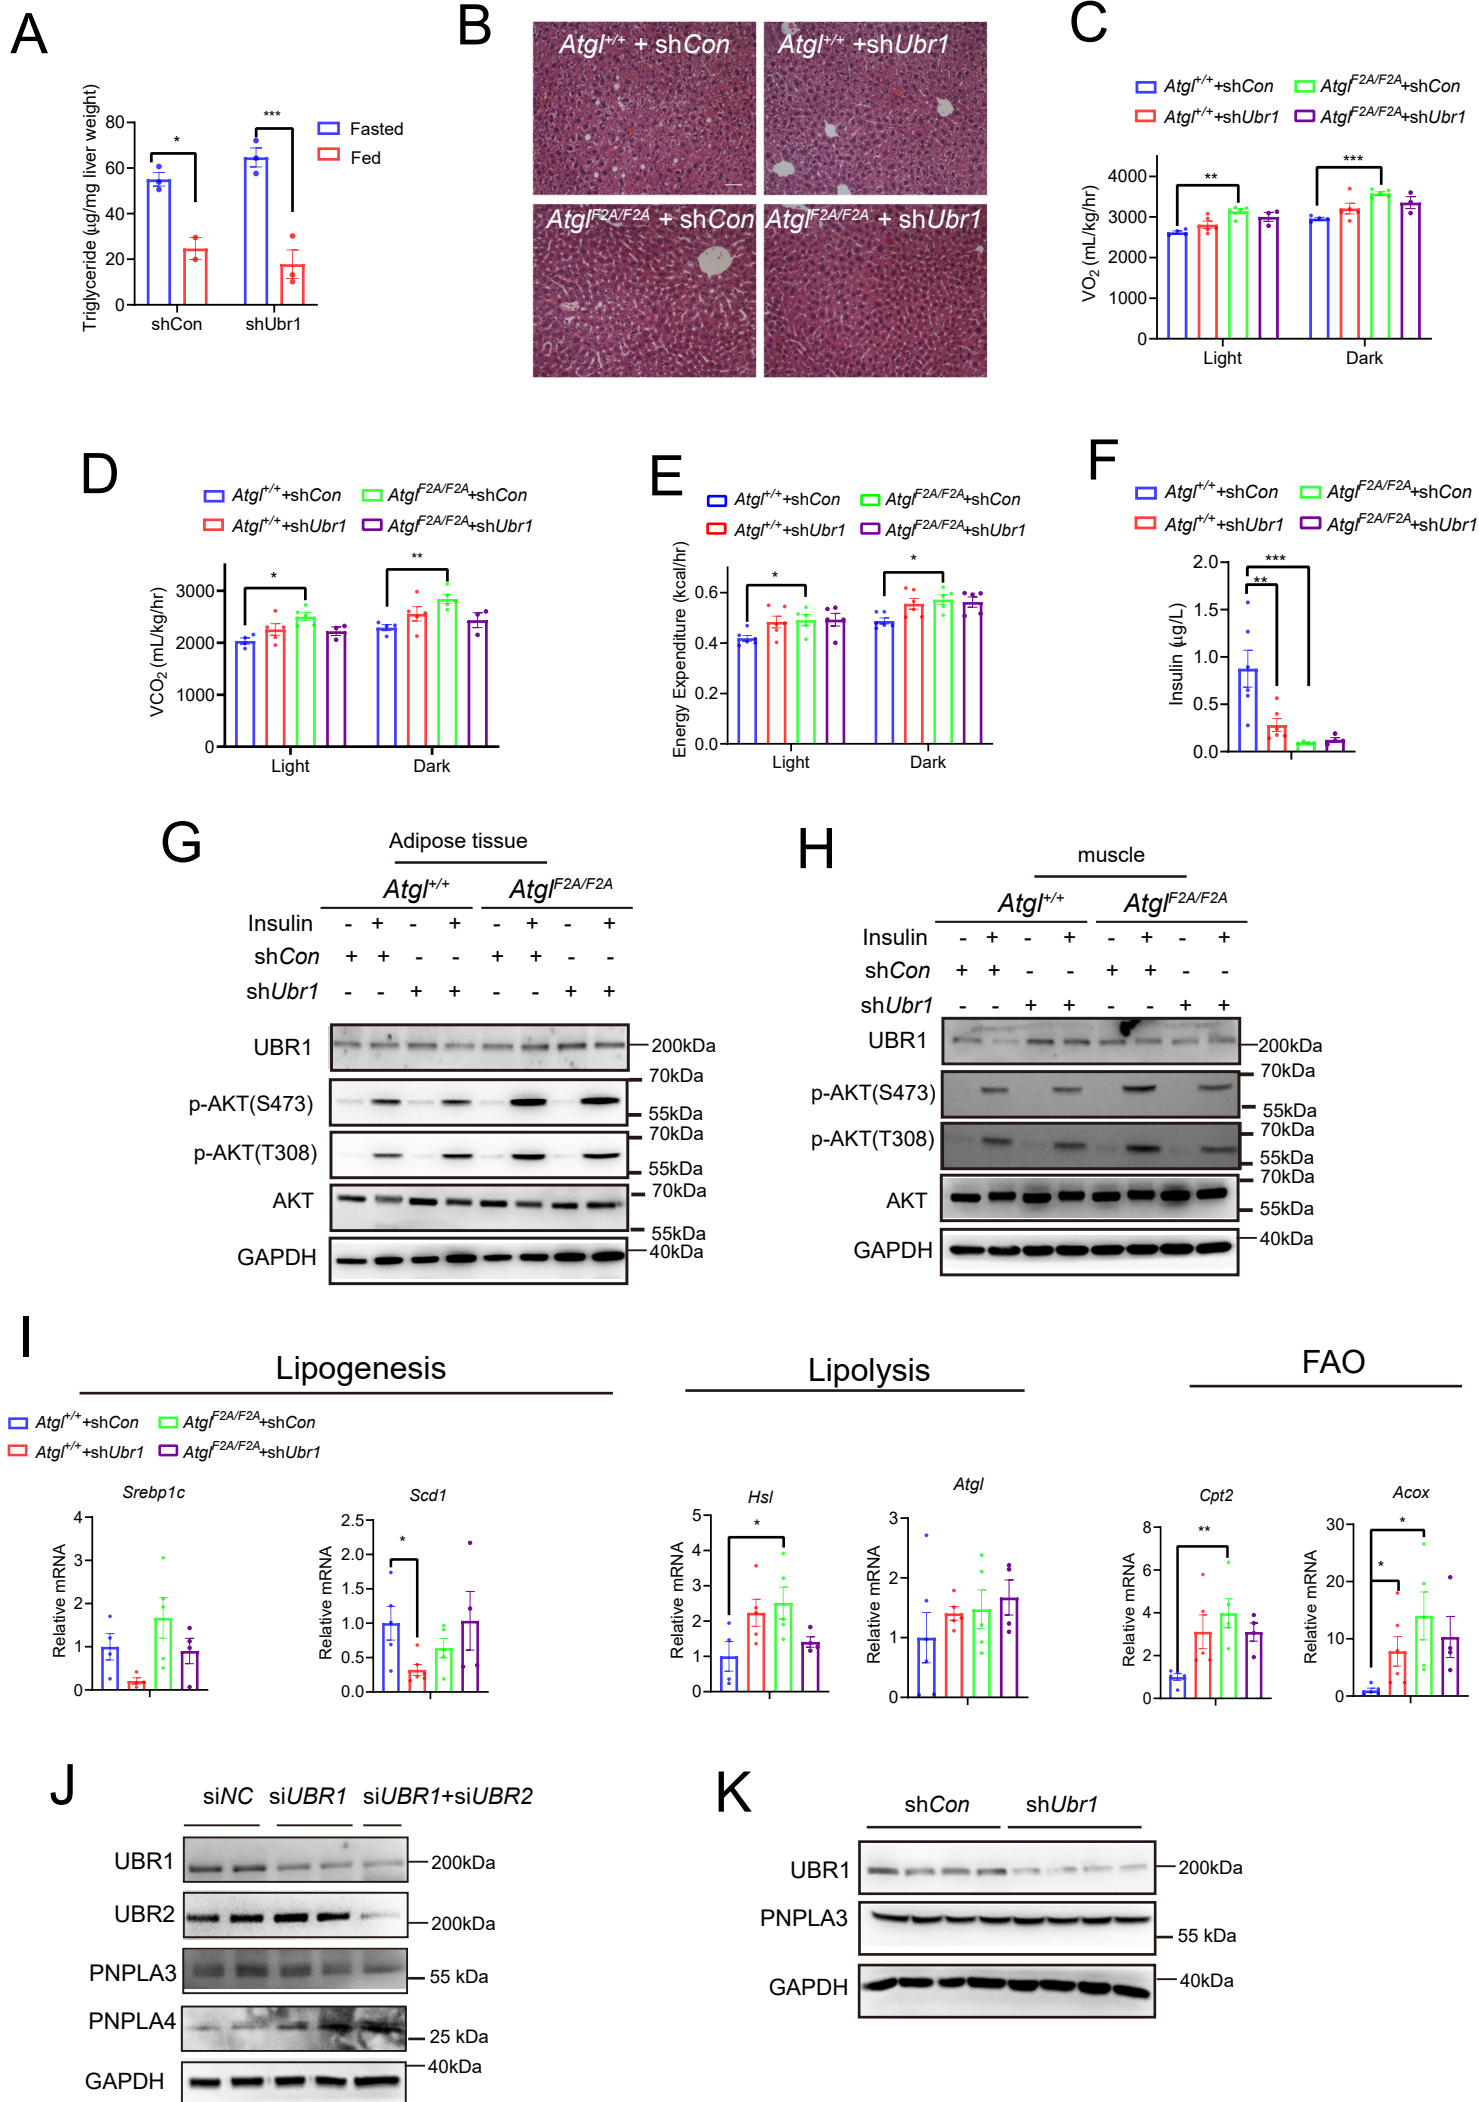

Supplemental Fig. 4 Knockdown of *Ubr1* suppresses HFD-induced hepatic steatosis dependent on the activity of ATGL.

(A) 8-week-old C57BL/6 mice were injected with AAV-TBG-sh*Con* or AAV-TBG-sh*Ubr1* and fed a chow diet for 1 month. Hepatic TAG levels were measured in fed or 16-hr fasted mice (N=2-3 mice per group). (B) H&E staining of liver sections from HFD-fed *Atgl*<sup>+/+</sup> and *Atgl*<sup>F2A/F2A</sup> mice injected with AAV-TBG-sh*Con* or AAV-TBG-sh*Ubr1*. (C-E) The oxygen consumption (C), CO<sub>2</sub> production (D), and energy expenditure (E) in 8-week-old *Atgl*<sup>+/+</sup> and *Atgl*<sup>F2A/F2A</sup> mice injected with AAV-TBG-sh*Con* or AAV-TBG-sh*Ubr1* and fed an HFD for 8 weeks (N=3-6 mice per group). (F) Plasma insulin levels in 8-week-old *Atgl*<sup>+/+</sup> and *Atgl*<sup>F2A/F2A</sup> mice injected with AAV-TBG-sh*Con* or AAV-TBG-sh*Ubr1* and fed an HFD for 8 weeks (N=4-6 mice per group). (G, H) Western blot analysis of proteins from the adipose tissue or muscle of HFD-fed mice which were fasted for 12 hours and injected with 1 U/kg insulin (i.p.). (I) mRNA levels of genes in lipogenesis, lipolysis, and FAO in 8-week-old *Atgl*<sup>+/+</sup> and *Atgl*<sup>F2A/F2A</sup> mice injected with AAV-TBG-sh*Con* or AAV-TBG-sh*Ubr1* and fed an HFD for 8 weeks (N=4-6 mice per group). (J) Western blot analysis of proteins in HeLa cells transfected with indicated siRNAs. (K) Western blot analysis of proteins in *Atgl*<sup>+/+</sup> mice injected with AAV-TBG-sh*Con* or AAV-TBG-sh*Ubr1* and fed an HFD for 8 weeks. \* p < 0.05, \*\* p < 0.01, \*\*\*p < 0.001.

Supplementary Table S1: Lipid storage phenotypes caused by RNAi knockdown of genes encoding proteasome components in *C. elegans*

| Gene function                  |                 | Gene name      | phenotype |
|--------------------------------|-----------------|----------------|-----------|
| Proteasome core subunit        | Alpha           | <i>pas-1</i>   | nd        |
|                                |                 | <i>pas-2</i>   | nd        |
|                                |                 | <i>pas-3</i>   | nd        |
|                                |                 | <i>pas-4</i>   | ---       |
|                                |                 | <i>pas-5</i>   | ---       |
|                                |                 | <i>pas-6</i>   | -         |
|                                |                 | <i>pas-7</i>   | nd        |
|                                | Beta            | <i>pbs-1</i>   | ---       |
|                                |                 | <i>pbs-2</i>   | ---       |
|                                |                 | <i>pbs-3</i>   | nd        |
|                                |                 | <i>pbs-4</i>   | --        |
|                                |                 | <i>pbs-5</i>   | -         |
|                                |                 | <i>pbs-6</i>   | ---       |
|                                |                 | <i>pbs-7</i>   | -         |
| Proteasome regulatory particle | Non ATPase-like | <i>rpn-1</i>   | -         |
|                                |                 | <i>rpn-2</i>   | nd        |
|                                |                 | <i>rpn-3</i>   | --        |
|                                |                 | <i>rpn-4</i>   | -         |
|                                |                 | <i>rpn-5</i>   | normal    |
|                                |                 | <i>rpn-6.1</i> | ---       |
|                                |                 | <i>rpn-6.2</i> | normal    |
|                                |                 | <i>rpn-7</i>   | --        |
|                                |                 | <i>rpn-8</i>   | --        |
|                                |                 | <i>rpn-9</i>   | nd        |
|                                |                 | <i>rpn-10</i>  | normal    |
|                                |                 | <i>rpn-11</i>  | -         |
|                                |                 | <i>rpn-12</i>  | nd        |
|                                | ATPase-like     | <i>rpt-1</i>   | --        |
|                                |                 | <i>rpt-2</i>   | -         |
|                                |                 | <i>rpt-3</i>   | normal    |
|                                |                 | <i>rpt-4</i>   | normal    |
|                                |                 | <i>rpt-5</i>   | --        |
|                                |                 | <i>rpt-6</i>   | nd        |

Lipid storage phenotypes were evaluated using PLIN-1::GFP (Liu et al., 2014). ---, -- and - stand

for severe, medium and mild reduction, respectively, in lipid storage compared to control worms.  
nd, not determined.

Supplementary Table S2: Metabolic profile of chow-diet fed *Atgl*<sup>+/+</sup> and *Atgl*<sup>F2A/F2A</sup> mice.

|                                           | <i>Atgl</i> <sup>+/+</sup> | <i>Atgl</i> <sup>F2A/F2A</sup> |
|-------------------------------------------|----------------------------|--------------------------------|
| Body weight (g)                           | 23.45±0.56                 | 23.77±0.78                     |
| Plasma triglyceride (mg/dL)               | 60.19±4.84                 | 72.69±4.81                     |
| Plasma cholesterol (mg/dL)                | 83.08±2.92                 | 72.98±4.82                     |
| Plasma glucose (mM)                       | 9.06±1.67                  | 7.57±0.75                      |
| Plasma insulin (μg/L)                     | 0.19±0.033                 | 0.13±0.027                     |
| Plasma FFA (fed) (mM)                     | 0.12±0.0098                | 0.15±0.019                     |
| Plasma FFA (fasted overnight) (mM)        | 1.38±0.13                  | 1.90±0.13 *                    |
| Hepatic triglyceride (μg/mg liver weight) | 9.92±1.28                  | 9.62±0.77                      |
| Hepatic cholesterol (μg/mg liver weight)  | 5.08±0.64                  | 4.93±0.36                      |

\* p<0.05

Supplementary Table S3: Plasma parameters in HFD-fed *Atgl*<sup>+/+</sup> and *Atgl*<sup>F2A/F2A</sup> mice.

|                             | <i>Atgl</i> <sup>+/+</sup> | <i>Atgl</i> <sup>F2A/F2A</sup> |
|-----------------------------|----------------------------|--------------------------------|
| Plasma triglyceride (mg/dL) | 50.25±5.13                 | 55.83±5.97                     |
| Plasma cholesterol (mg/dL)  | 170.51±23.06               | 189.79±18.28                   |
| Plasma glucose (mM)         | 8.11±1.35                  | 7.27±0.56                      |
| Plasma insulin (μg/L)       | 2.60±0.76                  | 0.87±0.098*                    |
| Plasma FFA (mM)             | 0.46±0.0088                | 0.56±0.034*                    |
| Adiponectin (ng/mL)         | 10.39±1.48                 | 9.48±0.99                      |
| Leptin (fold change)        | 1±0.37                     | 0.78±0.17                      |

\* p<0.05

Supplementary Table S4: siRNA sequences

| siRNA      | sense (5'-3')                        | antisense (5'-3')                   |
|------------|--------------------------------------|-------------------------------------|
| human UBR1 | 5' -<br>GGCGUUGAGUCUUCGAUUATT-<br>3' | 5'-<br>UAAUCGAAGACUCAACGCCTT-<br>3' |
| human UBR2 | 5' -<br>GCCGCUUUGAACUUAUCATT-<br>3'  | 5'-<br>UGAUAAAGUCAAAGCGGCTT-<br>3'  |
| human ATGL | 5' -<br>CGGCGAGAAUGUCAUUAUATT-<br>3' | 5'-<br>UAUAAUGACAUUCUCGCCGTT-<br>3' |
| human PEX2 | 5'-<br>GCUAGUUUGGUCCCAGUUUTT-<br>3'  | 5'-<br>AAACUGGGACCAAACUAGCTT-<br>3' |
| human COP1 | 5'-<br>GCUGUGGUCUACCAAUCUATT-<br>3'  | 5'-<br>UAGAUUGGUAGACCACAGCTT-<br>3' |
